# Supplementary material
Source: Springer Nature journal article supplement (https://www.springermedizin.de/resource/supplementary/13054_2009_7628_MOESM5_ESM.pdf/9730190)

**Control**

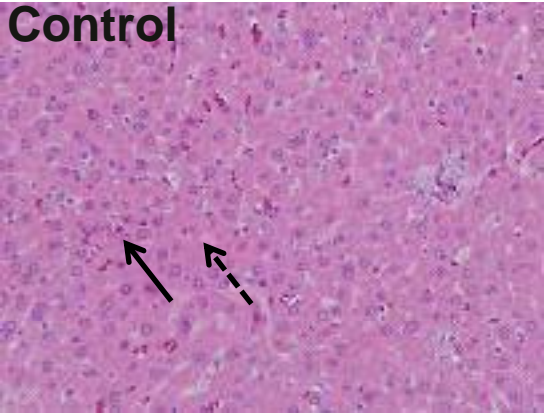

**AT**

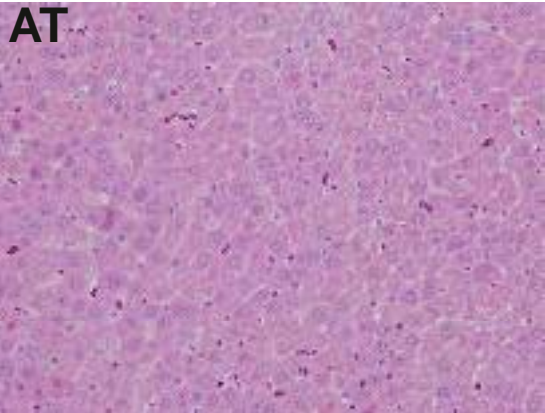

**TM**

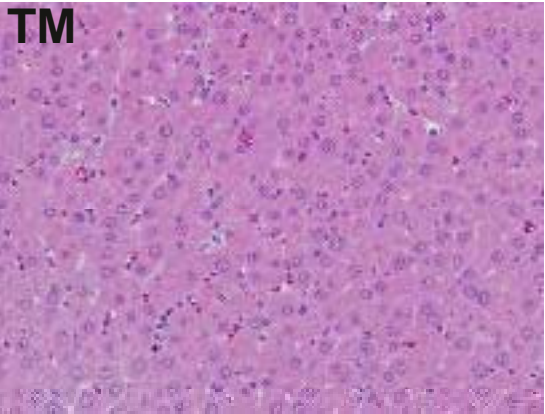

**AT + TM**

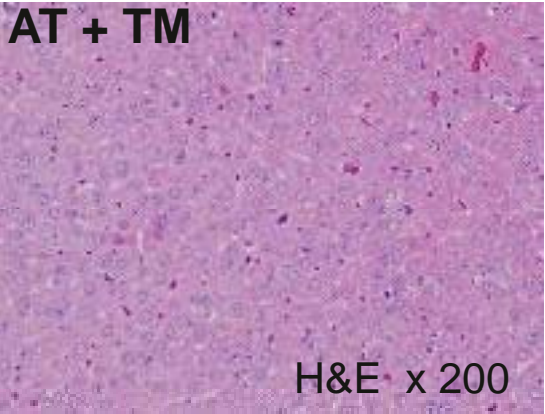

H&E x 200

Supplement: MOESM5 [file 9730190]
